# Supplementary material for: Diagnostics for Nipah virus: a zoonotic pathogen endemic to Southeast Asia
Source: PubMed Central journal article supplement — BMJ Glob Health. 2019 Feb 1;4(Suppl 2):e001118. doi: 10.1136/bmjgh-2018-001118 (PMC6361328; doi:10.1136/bmjgh-2018-001118), 2019-02-01
Supplement: bmjgh-2018-001118supp002.pdf [file bmjgh-2018-001118supp002.pdf]

**Table S2: Alignment to WHO TPPs and heat map:**

| <b>NiV</b>                                                                                    | <b>Target Use Setting</b>                                           |                             |                       |                       |     |                   |                                   |
|-----------------------------------------------------------------------------------------------|---------------------------------------------------------------------|-----------------------------|-----------------------|-----------------------|-----|-------------------|-----------------------------------|
|                                                                                               | <b>Facility-based testing and recommended diagnostic technology</b> |                             |                       |                       |     |                   | <b>Non-facility-based testing</b> |
| <b>Intended Use of Test</b>                                                                   | 4. National Reference Lab                                           | 3. Regional /Provincial Lab | 2. District Hospitals |                       |     | 1. Health Centres | 0. Health Posts, Field Settings   |
|                                                                                               | NAT, PRNT, ELISA                                                    | NAT, ELISA                  | POC NAT               | ELISA                 | RDT | RDT               | RDT                               |
| <b>Non-outbreak setting</b>                                                                   |                                                                     |                             |                       |                       |     |                   |                                   |
| Support syndromic surveillance systems (by adding specificity through diagnostic testing)     | PCR, sequencing, ELISA LDTs                                         | PCR, ELISA LDTs             | Not cost effective    | ELISA LDTs, LDT panel |     |                   |                                   |
| Clinical setting - detection of pathogen in syndromic case management (syndromic diagnostics) | LDT PCR panel                                                       | LDT PCR panel               | Does not exist        | ELISA LDT panel       |     |                   |                                   |
| Confirmation of pathogen                                                                      | PCR, virus isolation                                                | PCR                         | Does not exist        | IgM, Ag ELISA LDTs    |     |                   |                                   |
| <b>Outbreak setting</b>                                                                       |                                                                     |                             |                       |                       |     |                   |                                   |
| Diagnosis/confirmation of pathogen                                                            | PCR, virus isolation                                                | PCR, ELISA IgM LDT          | Does not exist        | ELISA IgM LDT         |     |                   |                                   |
| <b>Legend:</b>                                                                                |                                                                     |                             |                       |                       |     |                   |                                   |
| Platforms/tests available                                                                     |                                                                     |                             |                       |                       |     |                   |                                   |
| Lab and field trials ongoing or completed                                                     |                                                                     |                             |                       |                       |     |                   |                                   |
| Late-stage development                                                                        |                                                                     |                             |                       |                       |     |                   |                                   |
| Needed/useful – or needs improvement                                                          |                                                                     |                             |                       |                       |     |                   |                                   |
| Not needed/useful                                                                             |                                                                     |                             |                       |                       |     |                   |                                   |

\*Some NAAT tests may be region/strain specific; may require sequencing to maintain probe viability and pan-NiV or pan-henipavirus detection

°NAAT + ELISA recommended for NAAT (PCR) tests that may not detect generic strains or variants
